# Supplementary material for: Enhancement of photocatalytic H2 evolution on Zn0.8Cd0.2S loaded with CuS as cocatalyst and its photogenerated charge transfer properties
Source: Royal Society of Chemistry journal article supplement (doi:10.1039/c3dt51256h), 2013-01-01
Supplement: c3dt51256h.pdf [file c3dt51256h.pdf]

## Supporting Information

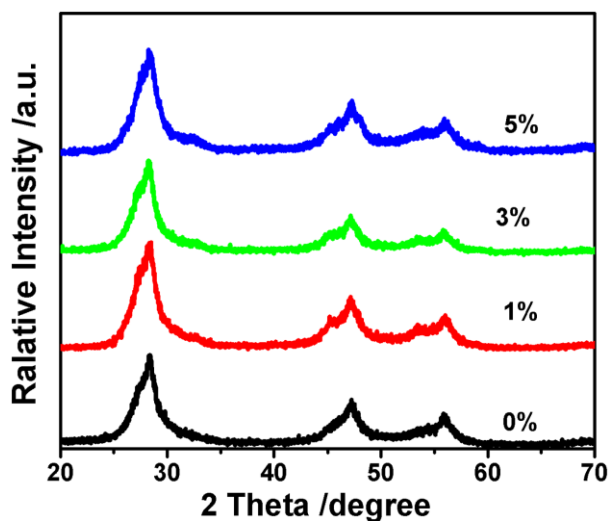

Fig S1. XRD of CuS/Zn<sub>0.8</sub>Cd<sub>0.2</sub>S with different weight percentages from 0 % - 5 %.

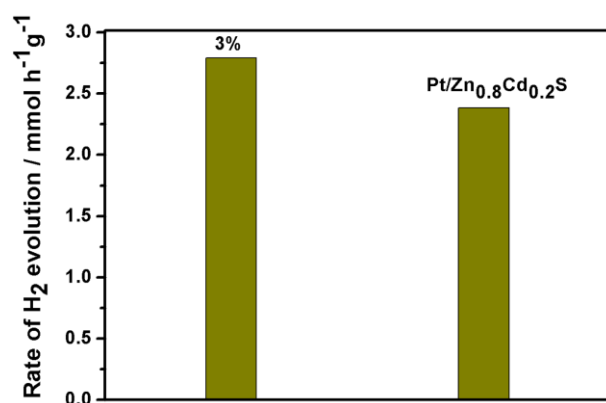

Fig S2. The rate of H<sub>2</sub> evolution on CuS (3wt %)/Zn<sub>0.8</sub>Cd<sub>0.2</sub>S, Pt (1wt %)/Zn<sub>0.8</sub>Cd<sub>0.2</sub>S.

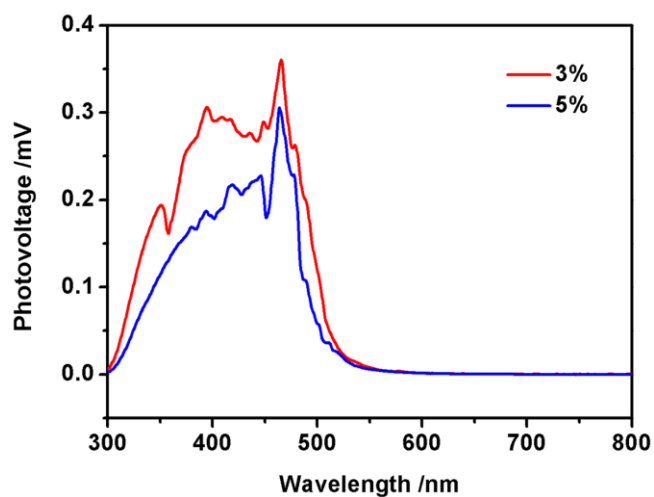

**Fig S3. The SPS of CuS (3 wt %) /Zn<sub>0.8</sub>Cd<sub>0.2</sub>S, CuS and CuS (5 wt %) /Zn<sub>0.8</sub>Cd<sub>0.2</sub>S.**

**Table S1. BET surface area of CuS (0 wt %) /Zn<sub>0.8</sub>Cd<sub>0.2</sub>S, CuS and CuS (1 wt %) /Zn<sub>0.8</sub> Cd<sub>0.2</sub>S, CuS (3 wt %) /Zn<sub>0.8</sub>Cd<sub>0.2</sub>S and CuS (5 wt %) /Zn<sub>0.8</sub> Cd<sub>0.2</sub>S.**

|                                      | 0%   | 1%   | 3%   | 5%   |
|--------------------------------------|------|------|------|------|
| BET surface area (m <sup>2</sup> /g) | 62.6 | 58.8 | 60.3 | 59.9 |

**Table S2. The molar fraction of Zn, Cd, S and Cu, in (3 wt %) /Zn<sub>0.8</sub>Cd<sub>0.2</sub>S, CuS and CuS (0 wt %) /Zn<sub>0.8</sub> Cd<sub>0.2</sub>S.**

|                                                  | Zn At% | Cd At% | S At% | Cu At% |
|--------------------------------------------------|--------|--------|-------|--------|
| CuS(0wt%) /Zn <sub>0.8</sub> Cd <sub>0.2</sub> S | 0.31   | 0.12   | 0.56  | 0      |
| CuS(3wt%) /Zn <sub>0.8</sub> Cd <sub>0.2</sub> S | 0.34   | 0.10   | 0.52  | 0.03   |
